# Supplementary material for: Dysregulation of a specific immune-related network of genes biologically defines a subset of schizophrenia
Source: PubMed Central journal article supplement (PMC6544656; doi:10.1038/s41398-019-0486-6), 2019-05-31
Supplement: 41398_2019_486_MOESM1_ESM.pdf [file 41398_2019_486_MOESM1_ESM.pdf]

# **Dysregulation of a specific immune-related network of genes biologically defines a subset of schizophrenia**

**Authors:** Svenja V. Trossbach<sup>1</sup>, Laura Hecher<sup>1†</sup>, David Schafflick<sup>2</sup>, René Deenen<sup>3§</sup>, Ovidiu Popa<sup>4</sup>, Tobias Lautwein<sup>2,3</sup>, Sarah Tschirner<sup>1</sup>, Karl Köhrer<sup>3</sup>, Karin Fehsel<sup>5</sup>, Irina Papazova<sup>6</sup>, Berend Malchow<sup>6</sup>, Alkomiet Hasan<sup>6</sup>, Georg Winterer<sup>5‡</sup>, Andrea Schmitt<sup>6,7</sup>, Gerd Meyer zu Hörste<sup>2</sup>, Peter Falkai<sup>6</sup>, Carsten Korth<sup>1\*</sup>

## **Contents: Supplementary Tables in order of appearance**

### **Supplementary Tables**

Supplementary Table 1: Demographic and clinical characteristics of schizophrenia patients and controls of cohort I and II.

Supplementary Table 2: Correlation analysis of top blood marker levels with neurocognitive variables.

Supplementary Table 3: Correlation analysis between further PBMC transcripts and cognitive domains or tests.

Supplementary Table 4: Primer information, cDNA dilution factor, PCR supplements and *n* depicted for the different human and rat target genes and cohorts.

Supplementary Table 5: Demographic and tissue information of SMRI Array Collection.

Supplementary Table 6: Extended microarray data tgDISC1 rat vs. controls as Excel-File (not included here, separate file)

## Supplementary Tables in order of their appearance

### Cohort I demographics

|                           | CTRL     |       |       | SCZ      |       |       | <i>P</i> |
|---------------------------|----------|-------|-------|----------|-------|-------|----------|
|                           | <i>N</i> | mean  | SD    | <i>N</i> | mean  | SD    |          |
| age                       | 50       | 34.18 | 11.74 | 16       | 34.31 | 8.45  | 0.691    |
| PANSS Total               |          |       |       | 16       | 53.75 | 21.83 |          |
| PANSS General             |          |       |       | 16       | 26.75 | 11.89 |          |
| PANSS Positive            |          |       |       | 16       | 11.50 | 5.63  |          |
| PANSS Negative            |          |       |       | 16       | 15.50 | 6.15  |          |
| school years              | 49       | 11.82 | 1.39  | 16       | 11.43 | 1.41  | 0.336    |
| professional school years | 47       | 3.00  | 1.76  | 16       | 2.31  | 1.70  | 0.209    |

|                   | CTRL        | SCZ       | $\chi^2(df_1)$ | <i>P</i> |
|-------------------|-------------|-----------|----------------|----------|
| sex (male:female) | 21:29       | 13:3      | 7.476 (1)      | 0.009*   |
| education (1-4)   | 3:4:12:5:24 | 0:2:7:2:5 | 3.622 (4)      | 0.460    |
| profession (1-5)  | 11:23:3:9:1 | 6:6:3:1:1 | 4.727 (4)      | 0.317    |

### Cohort II demographics

|                     | CTRL     |          |      | SCZ      |          |        | <i>F</i> ( <i>df</i> <sub>1</sub> , <i>df</i> <sub>2</sub> ) | <i>P</i> |
|---------------------|----------|----------|------|----------|----------|--------|--------------------------------------------------------------|----------|
|                     | <i>N</i> | <i>M</i> | (SD) | <i>N</i> | <i>M</i> | (SD)   |                                                              |          |
| age                 | 45       | 30.24    | 9.34 | 50       | 34.26    | 11.554 | 6.106 (1, 93)                                                | 0.065    |
| duration of illness |          |          |      | 50       | 8.81     | 8.79   |                                                              |          |
| age of onset        |          |          |      | 50       | 25.41    | 9.09   |                                                              |          |
| CPZ                 |          |          |      | 50       | 534.46   | 356.30 |                                                              |          |
| hospitalizations    |          |          |      | 50       | 3.80     | 2.97   |                                                              |          |
| PANSS Total         |          |          |      | 50       | 59.88    | 16.47  |                                                              |          |
| PANSS General       |          |          |      | 50       | 29.78    | 8.42   |                                                              |          |
| PANSS Positive      |          |          |      | 50       | 13.37    | 5.22   |                                                              |          |
| PANSS Negative      |          |          |      | 50       | 16.73    | 5.47   |                                                              |          |
| school years        | 45       | 12.46    | 1.10 | 50       | 11.48    | 2.22   | 15.167 (1, 93)                                               | 0.007*   |
| years of training   | 45       | 16.87    | 2.70 | 50       | 14.07    | 4.11   | 2.801 (1, 93)                                                | 0.003*   |

|                              | CTRL   | SCZ    | $\chi^2(df_1)$ | <i>P</i> |
|------------------------------|--------|--------|----------------|----------|
| sex (male:female)            | 29:16  | 39:11  | 2.139 (1)      | 0.175    |
| handedness (left:right:both) | 5:39:1 | 5:44:1 | 0.038 (2)      | 0.981    |
| language (german:foreign)    | 38:7   | 43:7   | 0.046 (1)      | 0.831    |
| Clozapine users (yes:no)     |        | 40:10  |                |          |

**Supplementary Table 1: Demographic and clinical characteristics of the SCZ patients and controls of cohort I (upper two panels) and II (lower two panels).** Statistics represent the comparison of SCZ patient groups with controls. Abbreviations: PANSS, Positive and Negative Syndrome Scale; CPZ, chlorpromazine equivalents (cross-sectional at day of blood drawing); education: 1 = no school degree, 2 = lowest school level “Hauptschule”, 3 = middle school level “Realschule”, 4 = highest school degree “Abitur”; profession: 1 = no, 2 = training, 3 = lower university degree “Fachhochschule”, 4 = university degree, 5 = PhD; M, mean; SD, standard deviation; Mdn, median; df, degree of freedom; F, F statistic;  $\chi^2$ , Chi Square; P, p-value.

|                                    |          | <b>RGS1</b> | <b>CCL4</b> | <b>RGS1+CCL4</b> |  | <b>DISC1</b>   |
|------------------------------------|----------|-------------|-------------|------------------|--|----------------|
| <b>VLMT: sum 1-5 (score)</b>       | <i>r</i> | 0.165       | -0.149      | 0.085            |  | $\tau$ 0.023   |
|                                    | <i>p</i> | 0.241       | 0.308       | 0.560            |  | <i>p</i> 0.816 |
|                                    | <i>N</i> | 52          | 49          | 49               |  | <i>N</i> 49    |
| <b>VLMT: trial 5 minus trial 7</b> | <i>r</i> | 0.128       | -0.149      | -0.038           |  | $\tau$ 0.04    |
|                                    | <i>p</i> | 0.368       | 0.308       | 0.795            |  | <i>p</i> 0.701 |
|                                    | <i>N</i> | 52          | 49          | 49               |  | <i>N</i> 49    |
| <b>TMT: A (in s)</b>               | <i>r</i> | 0.130       | -0.044      | 0.139            |  | $\tau$ 0.028   |
|                                    | <i>p</i> | 0.360       | 0.763       | 0.341            |  | <i>p</i> 0.782 |
|                                    | <i>N</i> | 52          | 49          | 49               |  | <i>N</i> 49    |
| <b>TMT: B (in s)</b>               | <i>r</i> | 0.179       | -0.190      | 0.003            |  | $\tau$ 0.063   |
|                                    | <i>p</i> | 0.209       | 0.196       | 0.981            |  | <i>p</i> 0.528 |
|                                    | <i>N</i> | 51          | 48          | 48               |  | <i>N</i> 48    |
| <b>DSST</b>                        | <i>r</i> | 0.259       | 0.079       | <b>0.313</b>     |  | $\tau$ 0.076   |
|                                    | <i>p</i> | 0.062       | 0.584       | <b>0.027*</b>    |  | <i>p</i> 0.441 |
|                                    | <i>N</i> | 53          | 50          | 50               |  | <i>N</i> 50    |
| <b>Memory domain</b>               | <i>r</i> | 0.199       | -0.141      | 0.069            |  | $\tau$ 0.004   |
|                                    | <i>P</i> | 0.162       | 0.339       | 0.640            |  | <i>p</i> 0.965 |
|                                    | <i>N</i> | 51          | 48          | 48               |  | <i>N</i> 48    |
| <b>Attention domain</b>            | <i>r</i> | 0.230       | -0.040      | 0.201            |  | $\tau$ 0.028   |
|                                    | <i>p</i> | 0.101       | 0.784       | 0.165            |  | <i>p</i> 0.776 |
|                                    | <i>N</i> | 52          | 49          | 49               |  | <i>N</i> 49    |
| <b>Global cognitive index</b>      | <i>r</i> | 0.216       | -0.058      | 0.187            |  | $\tau$ -0.02   |
|                                    | <i>p</i> | 0.131       | 0.700       | 0.208            |  | <i>p</i> 0,84  |
|                                    | <i>N</i> | 50          | 47          | 47               |  | <i>N</i> 47    |
| <b>DST: forward (score)</b>        | $\tau$   | -0.007      | 0.031       | -0.004           |  | $\tau$ -0.111  |
|                                    | <i>p</i> | 0.942       | 0.771       | 0.972            |  | <i>p</i> 0.297 |
|                                    | <i>N</i> | 52          | 49          | 49               |  | <i>N</i> 49    |
| <b>DST: backwards (score)</b>      | $\tau$   | 0.195       | -0.070      | 0.063            |  | $\tau$ -0.103  |
|                                    | <i>p</i> | 0.059       | 0.509       | 0.556            |  | <i>p</i> 0.338 |
|                                    | <i>N</i> | 52          | 49          | 49               |  | <i>N</i> 49    |

**Supplementary Table 2: Correlation analysis of top blood marker levels with neurocognitive variables in cohort II.** Abbreviations: VLMT: Verbal Learning and Memory Test; DST: Digit-Span-Test; DSST: Digit Symbol Substitution Test; TMT: Trial Making Test; *r*: Pearson's correlation coefficient;  $\tau$ : Kendall-Tau's correlation coefficient, *p*: p-value \*  $p < .05$

|                             |          | NKG7   | IL13RA1 | IFNG               | SLC27A2 | IL12RB2            | FPR2   | KMO    | SERPINB1 | CCR5   | C3     | JAK2  |
|-----------------------------|----------|--------|---------|--------------------|---------|--------------------|--------|--------|----------|--------|--------|-------|
| VLMT: sum 1-5 (score)       | <i>r</i> | 0.047  | -0.041  | -0.120             | 0.002   | 0.009              | -0.093 | -0.103 | -0.161   | -0.084 | 0.178  | 0.069 |
|                             | <i>p</i> | 0.744  | 0.776   | 0.397              | 0.991   | 0.953              | 0.531  | 0.480  | 0.281    | 0.576  | 0.254  | 0.649 |
|                             | <i>N</i> | 50     | 50      | 52                 | 52      | 49                 | 48     | 49     | 47       | 47     | 43     | 46    |
| VLMT: trial 5 minus trial 7 | <i>r</i> | 0.090  | -0.065  | -0.097             | 0.001   | -0.160             | 0.284  | 0.141  | -0.043   | 0.107  | 0.252  | 0.098 |
|                             | <i>p</i> | 0.534  | 0.654   | 0.494              | 0.996   | 0.272              | 0.050  | 0.334  | 0.776    | 0.475  | 0.103  | 0.518 |
|                             | <i>N</i> | 50     | 50      | 52                 | 52      | 49                 | 48     | 49     | 47       | 47     | 43     | 46    |
| TMT: A (in s)               | <i>r</i> | 0.071  | 0.022   | 0.134              | 0.028   | 0.275              | -0.092 | -0.021 | -0.123   | 0.273  | 0.070  | 0.151 |
|                             | <i>p</i> | 0.625  | 0.879   | 0.344              | 0.846   | 0.056              | 0.530  | 0.889  | 0.411    | 0.063  | 0.653  | 0.318 |
|                             | <i>N</i> | 50     | 50      | 52                 | 52      | 49                 | 49     | 49     | 47       | 47     | 44     | 46    |
| TMT: B (in s)               | <i>r</i> | 0.005  | 0.083   | -,279 <sup>†</sup> | -0.113  | 0.066              | -0.132 | 0.045  | -0.114   | 0.112  | -0.126 | 0.212 |
|                             | <i>p</i> | 0.975  | 0.569   | <b>0.047*</b>      | 0.429   | 0.658              | 0.372  | 0.760  | 0.451    | 0.458  | 0.420  | 0.163 |
|                             | <i>N</i> | 49     | 49      | 51                 | 51      | 48                 | 48     | 48     | 46       | 46     | 43     | 45    |
| DSST                        | <i>r</i> | 0.214  | -0.025  | 0.129              | 0.109   | ,392 <sup>**</sup> | -0.125 | -0.153 | 0.102    | 0.197  | 0.206  | 0.199 |
|                             | <i>p</i> | 0.131  | 0.859   | 0.358              | 0.437   | 0.005              | 0.391  | 0.290  | 0.492    | 0.180  | 0.180  | 0.179 |
|                             | <i>N</i> | 51     | 51      | 53                 | 53      | 50                 | 49     | 50     | 48       | 48     | 44     | 47    |
| Memory domain               | <i>r</i> | 0.094  | -0.021  | -0.146             | -0.080  | -0.075             | 0.076  | 0.067  | -0.151   | 0.050  | 0.227  | 0.021 |
|                             | <i>p</i> | 0.520  | 0.888   | 0.307              | 0.575   | 0.611              | 0.610  | 0.653  | 0.316    | 0.741  | 0.147  | 0.890 |
|                             | <i>N</i> | 49     | 49      | 51                 | 51      | 48                 | 47     | 48     | 46       | 46     | 42     | 45    |
| Attention domain            | <i>r</i> | 0.136  | 0.026   | -0.001             | 0.008   | ,309 <sup>†</sup>  | -0.133 | -0.076 | -0.037   | 0.244  | 0.080  | 0.238 |
|                             | <i>p</i> | 0.347  | 0.858   | 0.992              | 0.956   | 0.031              | 0.363  | 0.606  | 0.805    | 0.098  | 0.605  | 0.111 |
|                             | <i>N</i> | 50     | 50      | 52                 | 52      | 49                 | 49     | 49     | 47       | 47     | 44     | 46    |
| Global cognitive index      | <i>r</i> | 0.134  | 0.031   | -0.119             | -0.077  | 0.167              | -0.017 | -0.058 | -0.041   | 0.102  | 0.174  | 0.159 |
|                             | <i>p</i> | 0.363  | 0.836   | 0.410              | 0.594   | 0.263              | 0.912  | 0.700  | 0.790    | 0.504  | 0.271  | 0.302 |
|                             | <i>N</i> | 48     | 48      | 50                 | 50      | 47                 | 47     | 47     | 45       | 45     | 42     | 44    |
| DST: forward (score)        | <i>r</i> | -0.058 | 0.021   | 0.066              | -0.114  | 0.079              | 0.022  | 0.023  | -0.100   | 0.004  | -0.021 | 0.016 |
|                             | <i>p</i> | 0.578  | 0.837   | 0.519              | 0.266   | 0.453              | 0.835  | 0.825  | 0.353    | 0.970  | 0.856  | 0.884 |
|                             | <i>N</i> | 50     | 50      | 52                 | 52      | 49                 | 48     | 49     | 47       | 47     | 43     | 46    |
| DST: backwards (score)      | <i>r</i> | 0.096  | 0.030   | 0.070              | -0.005  | 0.031              | -0.046 | -0.042 | -0.119   | 0.106  | 0.192  | 0.103 |
|                             | <i>p</i> | 0.362  | 0.776   | 0.499              | 0.961   | 0.769              | 0.672  | 0.690  | 0.274    | 0.327  | 0.092  | 0.352 |
|                             | <i>N</i> | 50     | 50      | 52                 | 52      | 49                 | 48     | 49     | 47       | 47     | 43     | 46    |

**Supplementary Table 3: Correlation analysis between further PBMC transcripts and cognitive domains or tests.** Abbreviations: VLMT: Verbal Learning and Memory Test; DST: Digit-Span-Test; DSST: Digit Symbol Substitution Test; TMT: Trial Making Test; *r*: Pearson's correlation coefficient;  $\tau$ : Kendall-Tau's correlation coefficient, *p*: p-value \*  $p < .05$

| target (rat) | primer forward 5'-3'  | primer reverse 5'-3'       | primer conc F/R | cDNA dilution       | add-ons     | LM [n] | TG [n] |
|--------------|-----------------------|----------------------------|-----------------|---------------------|-------------|--------|--------|
| Actin        | GAGAGGAAAATCGTGCGTG   | CATGGATGCCACAGGATTCC       | 300/300 nM      | dependent on target | no          |        |        |
| C3           | GAGAGCTGGTTGTGGACCAT  | CAGTCGCAGGTCAATGAAGA       | 50/300 nM       | 1:25                | 5% Factor Q | 7      | 5      |
| Ccl4         | CTCTCTCCTCCTGCTTGTGG  | CACAGATTTGCCTGCCTTTT       | 900/50 nM       | 1:25                | 5% Factor Q | 8      | 6      |
| Cd11b        | TATTCGGCTCCAACCTGCTG  | CGATCGTGTTGATGCTACCG       | 300/300 nM      | 1:10                | no          | 8      | 7      |
| Cd3g         | CTGGACAGGATGGAGTTCCG  | TTGGAGACGGCTGTACTGTTC      | 300/300 nM      | 1:10                | no          | 8      | 7      |
| lfng         | GCCCTCTCTGGCTGTTACTG  | CTGATGGCCTGGTTGTCTTT       | 50/300 nM       | 1:25                | 5% Factor Q | 7      | 3      |
| Il12rb2      | AGCCTCTTAACAGCACATCCT | TGAAATTCATATTCTGTGAATGGTCT | 300/300 nM      | 1:25                | no          | 8      | 5      |
| Il13ra1      | GAAACATGGAGGGTGCAAGT  | CACTGCGACAAAGACTGGAA       | 300/300 nM      | 1:25                | 5% Factor Q | 7      | 5      |
| Il1b         | CGTGGGATGATGACGACCTG  | GCCACAGGGATTTTGTCTGTT      | 300/300 nM      | 1:10                | no          | 8      | 7      |
| Nkg7         | GAGCCCTACCGTCCCTG     | GCAGACCTGTGTACACGTGG       | 900/50 nM       | 1:10                | no          | 8      | 7      |
| Rgs1         | CCTTGCCAACAGATGGGTC   | CAGCATCTGAGTGACAAATGC      | 50/300 nM       | 1:10                | no          | 8      | 7      |
| Slc27a2      | GCAGGAAATACAACGCCACT  | TCTTCCAACAGCTCCGATTT       | 50/300 nM       | 1:25                | 5% Factor Q | 8      | 5      |

| target (human) | primer forward 5'-3'    | primer reverse 5'-3'   | primer conc F/R | cDNA dilution       | add-ons | group 2   LMU |         | group 1   HHU |         |
|----------------|-------------------------|------------------------|-----------------|---------------------|---------|---------------|---------|---------------|---------|
|                |                         |                        |                 |                     |         | CTRL [n]      | SCZ [n] | CTRL [n]      | SCZ [n] |
| ARF1           | GACCACGATCCTCTACAAGC    | TCCCACACAGTGAAGCTGATG  | 300/300 nM      | dependent on target | no      |               |         |               |         |
| ACTINB1        | AGATCAAGATCATTGCTCCTCC  | CTTGTTTTCTGCGCAAGTTAGG | 300/300 nM      | dependent on target | no      |               |         |               |         |
| C3             | GCTCCAGACACAGATGACCTG   | GCGTAGACCTTGACTGCTCCAG | 50/300 nM       | 1:10                | no      | ---           | ---     | 44            | 15      |
| C3             | CCCTCACGGCCTTTGTTCTC    | GCCAGAGCATAGCCAGCAATG  | 300/300 nM      | 1:10                | no      | 38            | 45      | ---           | ---     |
| CCL4           | CTGAGTTCTGCAGCCTCACC    | CTGGGATCAGCACAGACTTGC  | 300/300 nM      | 1:10                | no      | 41            | 51      | 49            | 15      |
| CCR5           | GAGACATCCGTTCCCTACAAG   | GTGAGTAGAGCGGAGGCAGG   | 300/300 nM      | 1:10                | no      | 38            | 48      | 30            | 12      |
| CD14           | GGAAGACTTATCGACCATGGAGC | CGCAGCGGAAATCTTCATCG   | 300/300 nM      | 1:10                | no      | 36            | 47      | ---           | ---     |
| CD4            | ATGAACCGGGGAGTCCCTTT    | CAGCTTGGATGGACCTTTAGTT | 300/300 nM      | 1:25                | no      | 39            | 50      | ---           | ---     |
| CD8B           | CGCAGCTGACAGTTCTCCAT    | GTCAGTCTCGGTGCCTG      | 300/300 nM      | 1:50                | no      | 39            | 50      |               |         |
| DISC1          | ACACCCCACTGAGAATGGAG    | GTTGCTGCTCTTGCTCCTCT   | 300/300 nM      | 1:10                | no      | 44            | 49      | 50            | 16      |
| FPR2           | GTGTCCTATGAGTCTGCTGG    | CCATGGCCATGGAGACAATG   | 300/300 nM      | 1:10                | no      | 45            | 50      | ---           | ---     |
| IFNG           | GGCTGTAGATTCTCGAGTGCGG  | CGCTACATCTGAATGACCTGC  | 300/300 nM      | 1:50                | no      | 43            | 54      | 50            | 14      |
| IL12RB2        | GACTGTGGCCTGCACCTG      | GACAGCAGTAACCTTGGCTGTG | 300/300 nM      | 1:10                | no      | 42            | 51      | 47            | 16      |
| IL13RA1        | CCACCCGAGGGAGCCAGCTC    | CTTCTGGGGGTGAGATGC     | 50/50 nM        | 1:10                | no      | 44            | 52      | 50            | 16      |
| IL1B           | CAGAAGTACCTGAGCTCGCC    | AGATTCGTAGCTGGATGCCG   | 300/300 nM      | 1:10                | no      | 34            | 43      | ---           | ---     |
| JAK2           | GAATGTCTTGGGATGGCAGTG   | CAGTGGCTTTGCATTGGCTG   | 300/300 nM      | 1:10                | no      | 38            | 47      | ---           | ---     |

|          |                        |                        |            |      |    |    |    |     |     |
|----------|------------------------|------------------------|------------|------|----|----|----|-----|-----|
| KMO      | GAATGCGGGCTTTGAAGACTG  | CGCGTGATCATCTGGGATTC   | 300/300 nM | 1:10 | no | 44 | 50 | --- | --- |
| NKG7     | CCCGCTTGTCTCAACCACC    | CACAGTGAGCACCCAGGC     | 300/300 nM | 1:10 | no | 40 | 52 | 45  | 16  |
| NKp46    | GAAGCCTTTTTGCCGTGGAC   | CAGGATGAACCGAGAGGGTG   | 300/300 nM | 1:10 | no | 34 | 45 | --- | --- |
| RGS1     | GAGTTCTGGCTGGCTTGTGAAG | GGCTGTAGATTCTCGAGTGCGG | 300/300 nM | 1:10 | no | 43 | 54 | 49  | 16  |
| SERPINB1 | GACCAGAGGTAACACGGCAG   | CACTGGCCAGGTCAGCAC     | 300/300 nM | 1:10 | no | 39 | 48 | --- | --- |
| SLC27A2  | CCACGACAGAGTTGGAGATAC  | GGCCTTGCATAACTAGGTAGG  | 300/300 nM | 1:25 | no | 43 | 54 | 48  | 16  |

**Supplementary Table 4:** Primer information, cDNA dilution factor, PCR supplements and *n* depicted for the different human and rat target genes and cohorts. Abbreviations: LM, non-transgenic littermate control; TG, tgDISC1 rat; CTRL, control subjects; SCZ, schizophrenic subjects.

|                       | total    | expression | no measureable<br>expression | no expression |
|-----------------------|----------|------------|------------------------------|---------------|
|                       | <i>n</i> | <i>n</i>   | <i>n</i>                     | % of total    |
| <b>CTRL</b>           | 7        | 7          | 0                            | 0             |
| <b>BD</b>             | 7        | 4          | 3                            | 43            |
| <b>SCZ</b>            | 8        | 7          | 1                            | 13            |
| <i>P</i> ( $\chi^2$ ) | 0.101    |            |                              |               |

|                     | <b>N   control</b> |       |       | <b>B   Bipolar</b> |       |       | <b>S   Schizophrenia</b> |       |       |
|---------------------|--------------------|-------|-------|--------------------|-------|-------|--------------------------|-------|-------|
|                     | <i>n</i>           | mean  | SD    | <i>n</i>           | mean  | SD    | <i>n</i>                 | mean  | SD    |
| age                 | 7                  | 45.43 | 5.91  | 7                  | 47.43 | 13.64 | 8                        | 36.75 | 10.44 |
| PMI                 | 7                  | 31.71 | 16.17 | 7                  | 38.71 | 16.39 | 8                        | 29.25 | 9.10  |
| pH                  | 7                  | 6.60  | 0.23  | 7                  | 6.34  | 0.43  | 8                        | 6.51  | 0.17  |
| Duration of illness |                    |       |       | 7                  | 15.29 | 6.55  | 8                        | 16.25 | 11.51 |
| Age of onset        |                    |       |       | 7                  | 32.14 | 12.02 | 8                        | 20.50 | 5.71  |
| AP dose             |                    |       |       | 7                  | 2571  | 3552  | 8                        | 91887 | 89126 |
| RQN                 | 7                  | 8.36  | 0.52  | 7                  | 8.44  | 0.29  | 8                        | 8.36  | 0.49  |

|                        | <b>N   control</b> | <b>B   Bipolar</b> | <b>S   Schizophrenia</b> |
|------------------------|--------------------|--------------------|--------------------------|
| sex (male:female)      | 4:3                | 2:5                | 5:3                      |
| Drug Lifetime (1-6)    | 7:0:0:0:0:0        | 4:0:0:2:0:1        | 3:0:1:1:0:2              |
| Alcohol Lifetime (1-6) | 5:1:0:1:0:0        | 2:3:0:1:0:1        | 4:2:1:0:0:1              |

**Supplementary Table 5: RGS1 expression in the brains of patients and controls of the SMRI Array Collection.** RGS1 is expressed by microglia in the brain. Upper table shows number of patients being RGS1 expressors or not. No significant difference between groups could be detected by Chi Square analysis. Lower panels depict demographics and tissue information for the patient samples used. Abbreviations: PMI, post mortem interval; AP dose, lifetime antipsychotic treatment dose, RQN, RNA quality score (1-10, 10 best); drug and alcohol lifetime: 1 = none, 2 = social, 3 = moderate past, 4 = moderate present; 5 = heavy past, 6 = heavy present,  $\chi^2$ , Chi Square.
