# Supplementary material for: Dysregulation of a specific immune-related network of genes biologically defines a subset of schizophrenia
Source: PubMed Central journal article supplement (PMC6544656; doi:10.1038/s41398-019-0486-6), 2019-05-31
Supplement: 41398_2019_486_MOESM3_ESM.pdf [file 41398_2019_486_MOESM3_ESM.pdf]

# **Dysregulation of a specific immune-related network of genes biologically defines a subset of schizophrenia**

**Authors:** Svenja V. Trossbach<sup>1</sup>, Laura Hecher<sup>1†</sup>, David Schafflick<sup>2</sup>, René Deenen<sup>3§</sup>, Ovidiu Popa<sup>4</sup>, Tobias Lautwein<sup>2,3</sup>, Sarah Tschirner<sup>1</sup>, Karl Köhrer<sup>3</sup>, Karin Fehsel<sup>5</sup>, Irina Papazova<sup>6</sup>, Berend Malchow<sup>6</sup>, Alkomiet Hasan<sup>6</sup>, Georg Winterer<sup>5‡</sup>, Andrea Schmitt<sup>6,7</sup>, Gerd Meyer zu Hörste<sup>2</sup>, Peter Falkai<sup>6</sup>, Carsten Korth<sup>1\*</sup>

## **Contents: Supplementary Figures in order of appearance**

**Supplementary Figure S1:** Validation of microarray hits deregulated in PBMCs of tgDISC1 rats compared to control rats by quantitative PCR.

**Supplementary Figure S2:** WGCNA analysis

**Supplementary Figure S3:** Flow cytometric phenotyping of tgDISC1 and littermate control blood.

**Supplementary Figure S4:** Flow cytometric phenotyping of tgDISC1 and littermate control splenocytes.

**Supplementary Figure S5:** Validation of microarray hits deregulated in PBMCs of tgDISC1 rats by qPCR in human PBMCs derived from two independent cohorts of patients diagnosed with schizophrenia and control subjects.

**Supplementary Figure S6:** Validation of further microarray hits deregulated in PBMCs of tgDISC1 rats by qPCR in human PBMCs derived from two independent cohorts of patients diagnosed with schizophrenia and control subjects.

**Supplementary Figure S7:** Expression profile of targets in human PBMC subclasses.

**Supplementary Figure S8:** Further expression profile data of targets in human PBMC subpopulations.

**Supplementary Figure S9:** Detailed correlation parameters between top hits expression levels measured in human subject samples of group II.

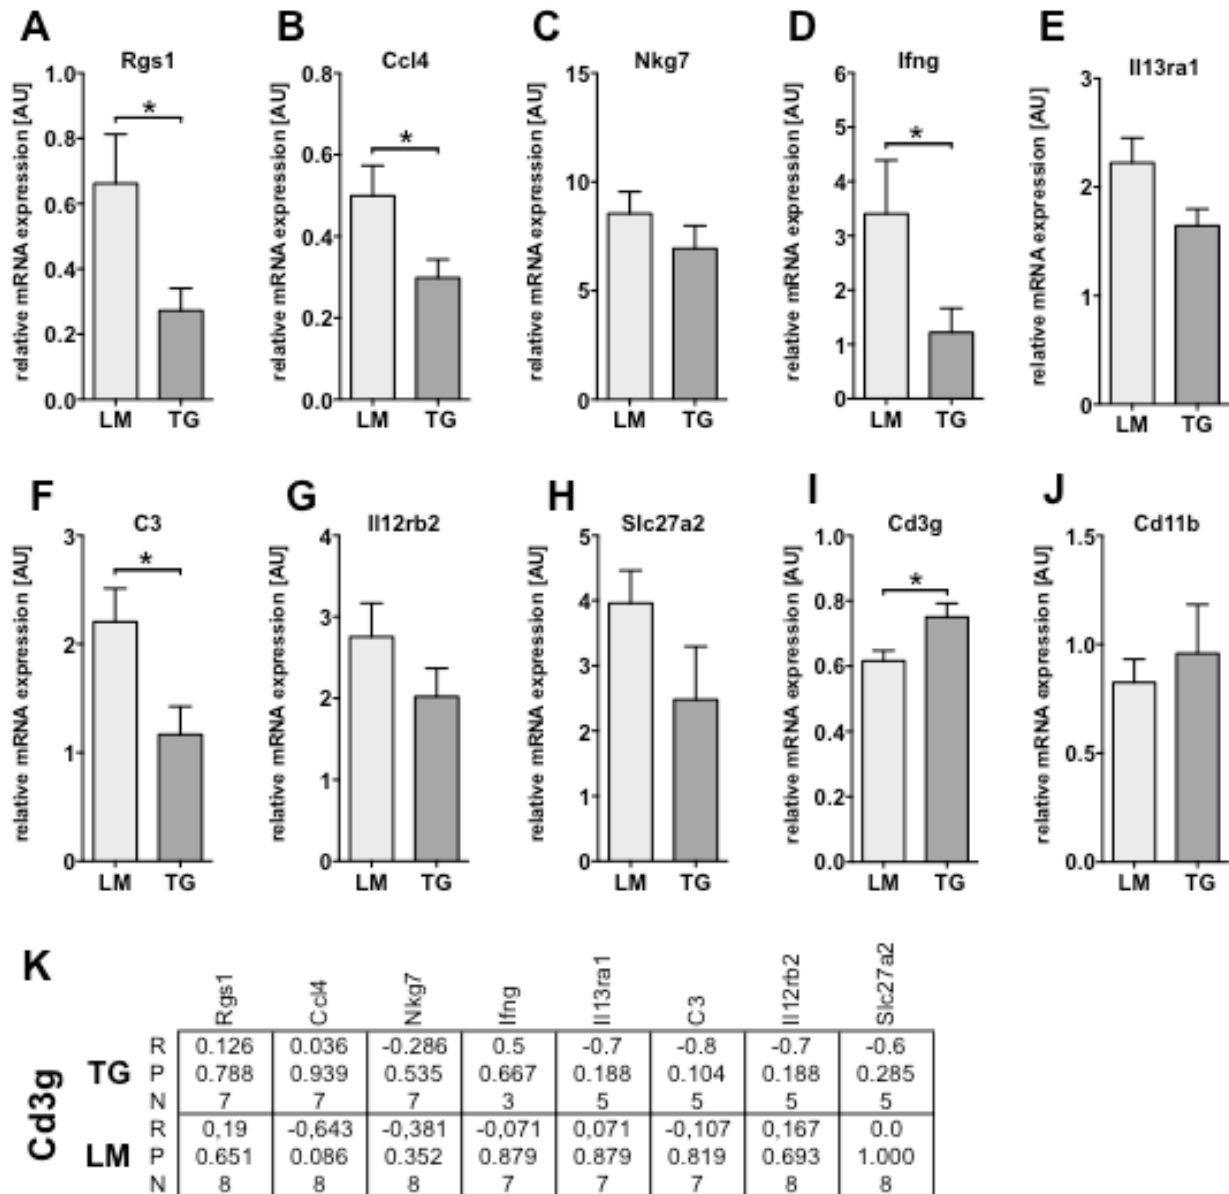

**Supplementary Figure S1: Validation of microarray hits deregulated in PBMCs of tgDISC1 rats (grey bars) compared to control rats (light bars) by quantitative Real-Time PCR. (A)** Expression of Rgs1 was reduced in tgDISC1 rats. T-test  $*P = 0.043$ . **(B)** Relative mRNA levels of Ccl4 were reduced in tgDISC1 rats. T-test  $*P = 0.043$ . **(C)** No expression change of Nkg7 was detectable in tgDISC1 rats. T-test  $P = 0.290$ . **(D)** Reduced

levels of *Ifng* mRNA were found in tgDISC1 rats. Mann-Whitney U-test  $*P = 0.053$ . (E) A trend towards reduced expression of *Il13ra1* was seen in tgDISC1 rats. T-test  $P = 0.085$ . (F) *C3* mRNA levels were reduced in tgDISC1 rats. T-test  $*P = 0.035$ . (G) No change expression could be seen for *Il12rb2* in tgDISC1 rats. T-test  $P = 0.244$ . (H) *Slc27a2* was not differentially expressed PBMCs of tgDISC1 rats. T-test  $P = 0.129$ . (I) An increase in *Cd3g* mRNA hinting towards increased T-cell number could be detected in tgDISC1 rats. T-test  $*P = 0.022$  (J) No change in *Cd11b* mRNA, a marker for monocytes, was detected in tgDISC1 rats compared to littermate controls. T-test  $P = 0.585$ . (K) As tgDISC1 rats showed increased expression of *Cd3g*, a pan T cell marker, the top hits were correlated against *Cd3g* data. No correlation of *Rgs1* or *Ccl4* levels with *Cd3g* could be found. Depicted are Spearman correlations with correlation coefficient  $R$ , number of animals  $N$  and P-value. Abbreviations: LM, non-transgenic littermate controls; TG, tgDISC1 rats; AU, arbitrary units. All means  $\pm$  s.e.m.

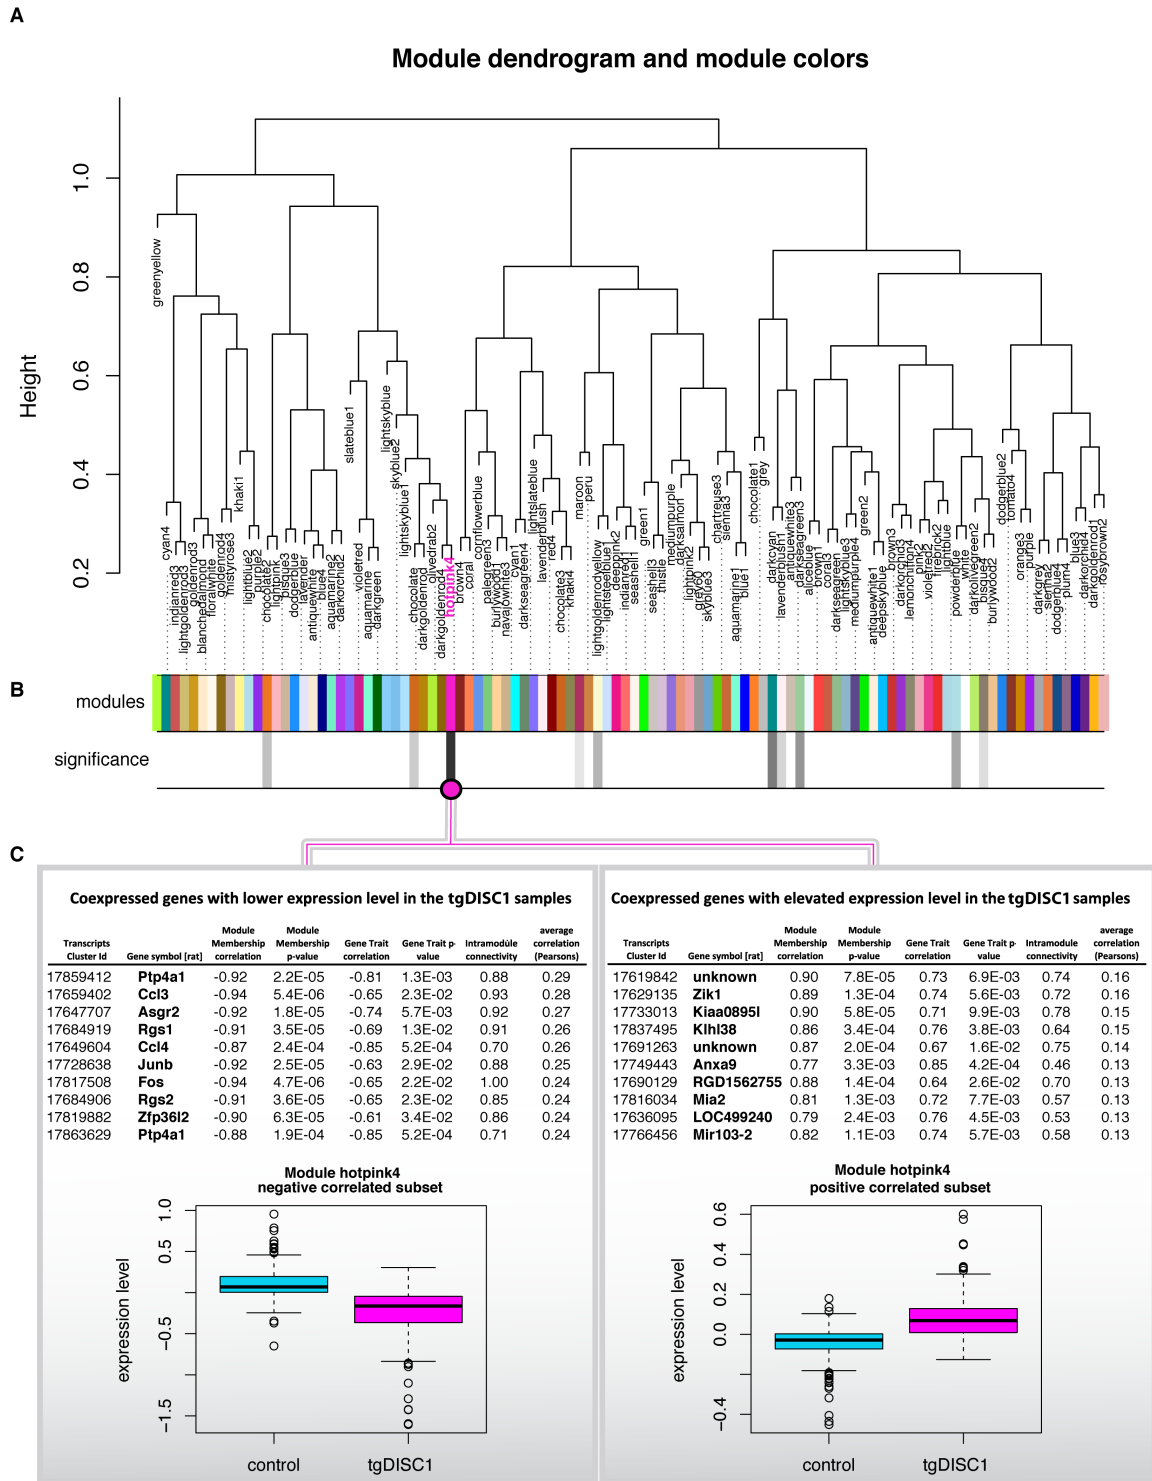

**Supplementary Figure S2: Co-expression analysis using WGCNA approach. (A)** Dendrogram of 104 modules calculated using the dissimilarity of the module eigengenes. **(B)** A color code is assigned for each module (color bar modules) and each module has an indication if it is significant regarding clinical traits (color bar significance). Non-significant



modules are white, modules with p-value  $<0.05$  are colored in grey shades depending on their significance from light grey to black which is the most significant module (hotpink4).

(C) Top 10 of most interconnected genes within the hotpink4 module divided into reduced expression level of TG compared to LM (left side) and elevated expression levels of TG compared to LM (right side). The differences in expression levels between TG and LM are shown in the box plot at the bottom of each subset. Abbreviations: LM, non-transgenic littermate controls; TG, tgDISC1 rats.

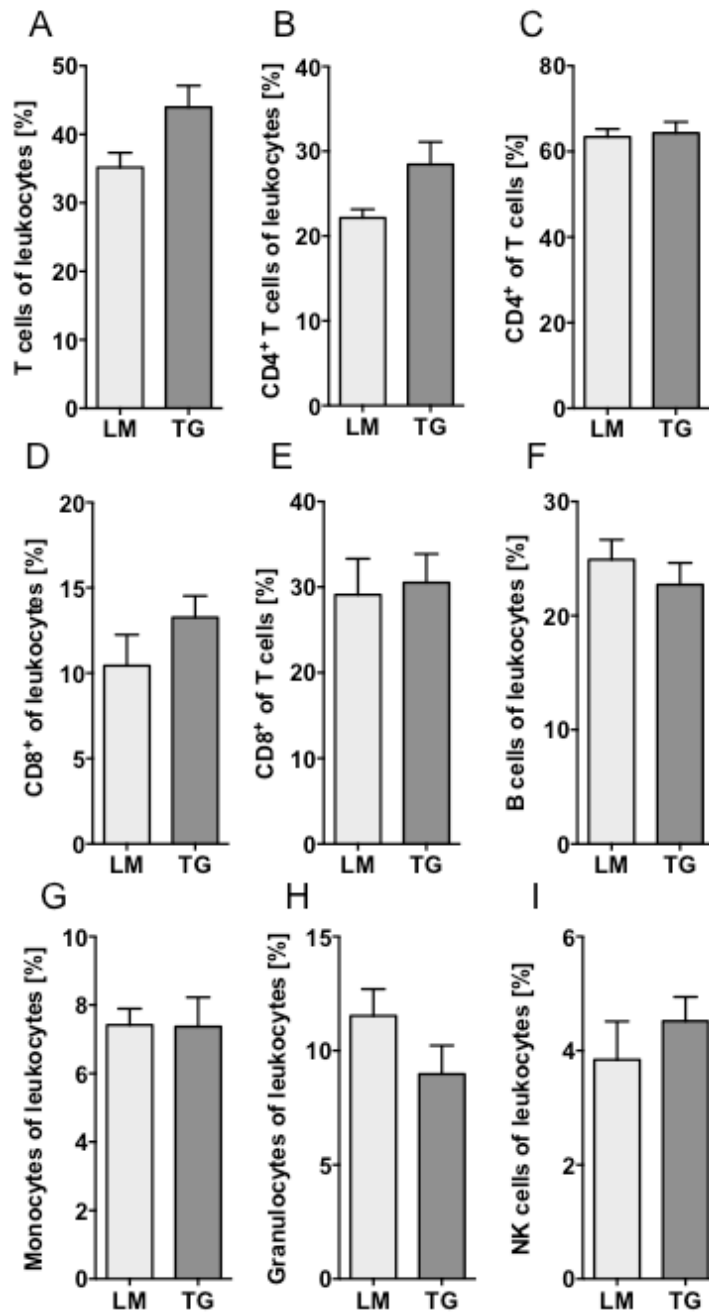

**Supplementary Figure S3: Flow cytometric phenotyping of tgDISC1 and littermate control blood.** TgDISC1 rats and littermate controls were immunologically phenotyped by flow cytometric analysis of common leukocyte lineages in the blood. (A) TgDISC1 rats showed a strong trend towards increased numbers of T cells of leukocytes. T-test  $P = 0.052$ . (B) The CD4<sup>+</sup> T cell population of leukocytes was slightly increased in tgDISC1 rats. T-test  $P = 0.076$ . (C) The CD4<sup>+</sup> T cell population of T cells was comparable between tgDISC1 rats

and controls. T-test  $P = 0.784$ . **(D)** The number of CD8<sup>+</sup> cells of leukocytes was unchanged. T-test  $P = 0.232$ . **(E)** There was no difference in percentage of CD8<sup>+</sup> T cells of leukocytes. T-test  $P = 0.797$ . **(F)** B cells were comparable between tgDISC1 rats and controls. T-test  $P = 0.416$ . **(G)** There was no difference in monocyte populations. T-test  $P = 0.963$ . **(H)** Numbers of granulocytes were unchanged between animal groups. T-test  $P = 0.170$ . **(I)** TgDISC1 rats had comparable NK cell population compared to controls. T-test  $P = 0.415$ . Abbreviations: LM, non-transgenic littermate controls; TG, tgDISC1 rats. All means  $\pm$  s.e.m.

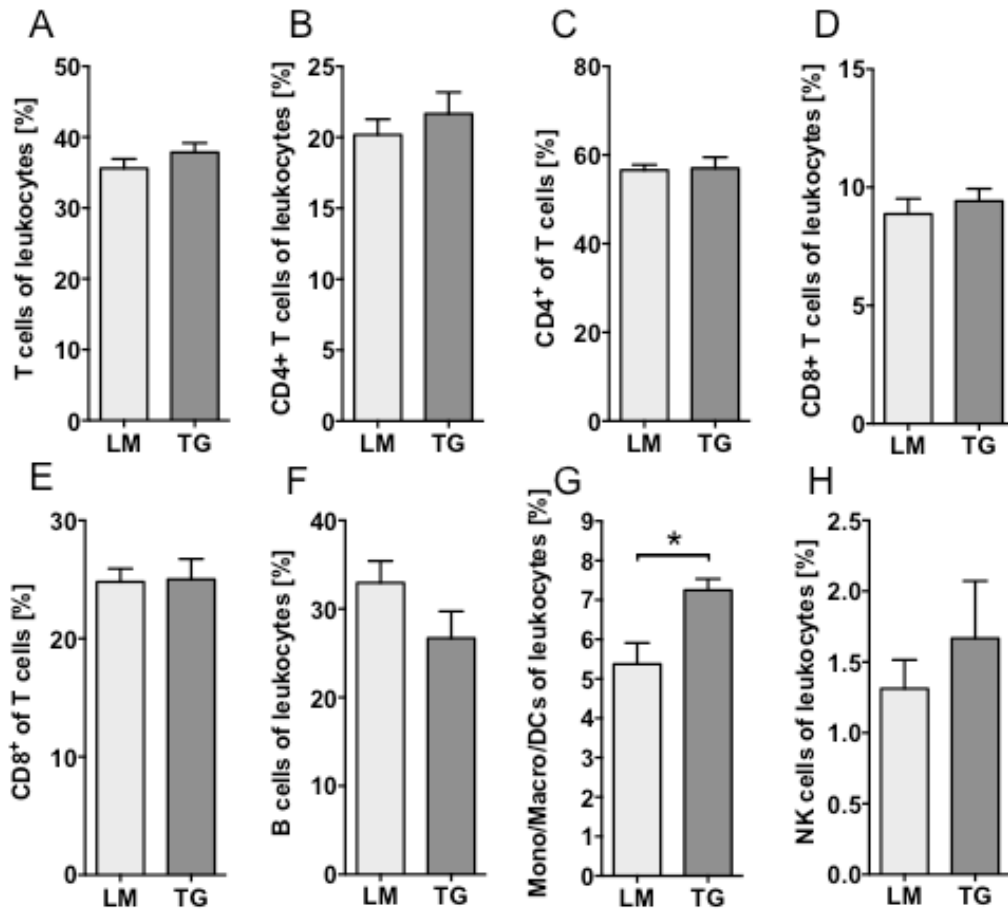

**Supplementary Figure S4: Flow cytometric phenotyping of tgDISC1 and littermate control splenocytes.** (A) Numbers of T cells of leukocytes are comparable between tgDISC1 and littermate control rats. T-test  $P = 0.259$ . (B) TgDISC1 rats had comparable CD4<sup>+</sup> T cell populations of leukocytes. T-test  $P = 0.450$ . (C) Also the number of CD4<sup>+</sup> T cells of leukocytes was unchanged. T-test  $P = 0.879$ . (D) There was no difference in percentage of CD8<sup>+</sup> T cells of leukocytes. T-test  $P = 0.523$ . (E) The number of CD8<sup>+</sup> cells of T cells was unchanged. T-test  $P = 0.917$ . (F) There was no difference in B cell populations. T-test  $P = 0.150$ . (G) TgDISC1 rats show an increase in monocyte/macrophage/dendritic cell populations. T-test  $*P = 0.021$ . (H) Numbers of NK cell populations were unchanged between animal groups. T-test  $P = 0.461$ . All means  $\pm$  s.e.m.

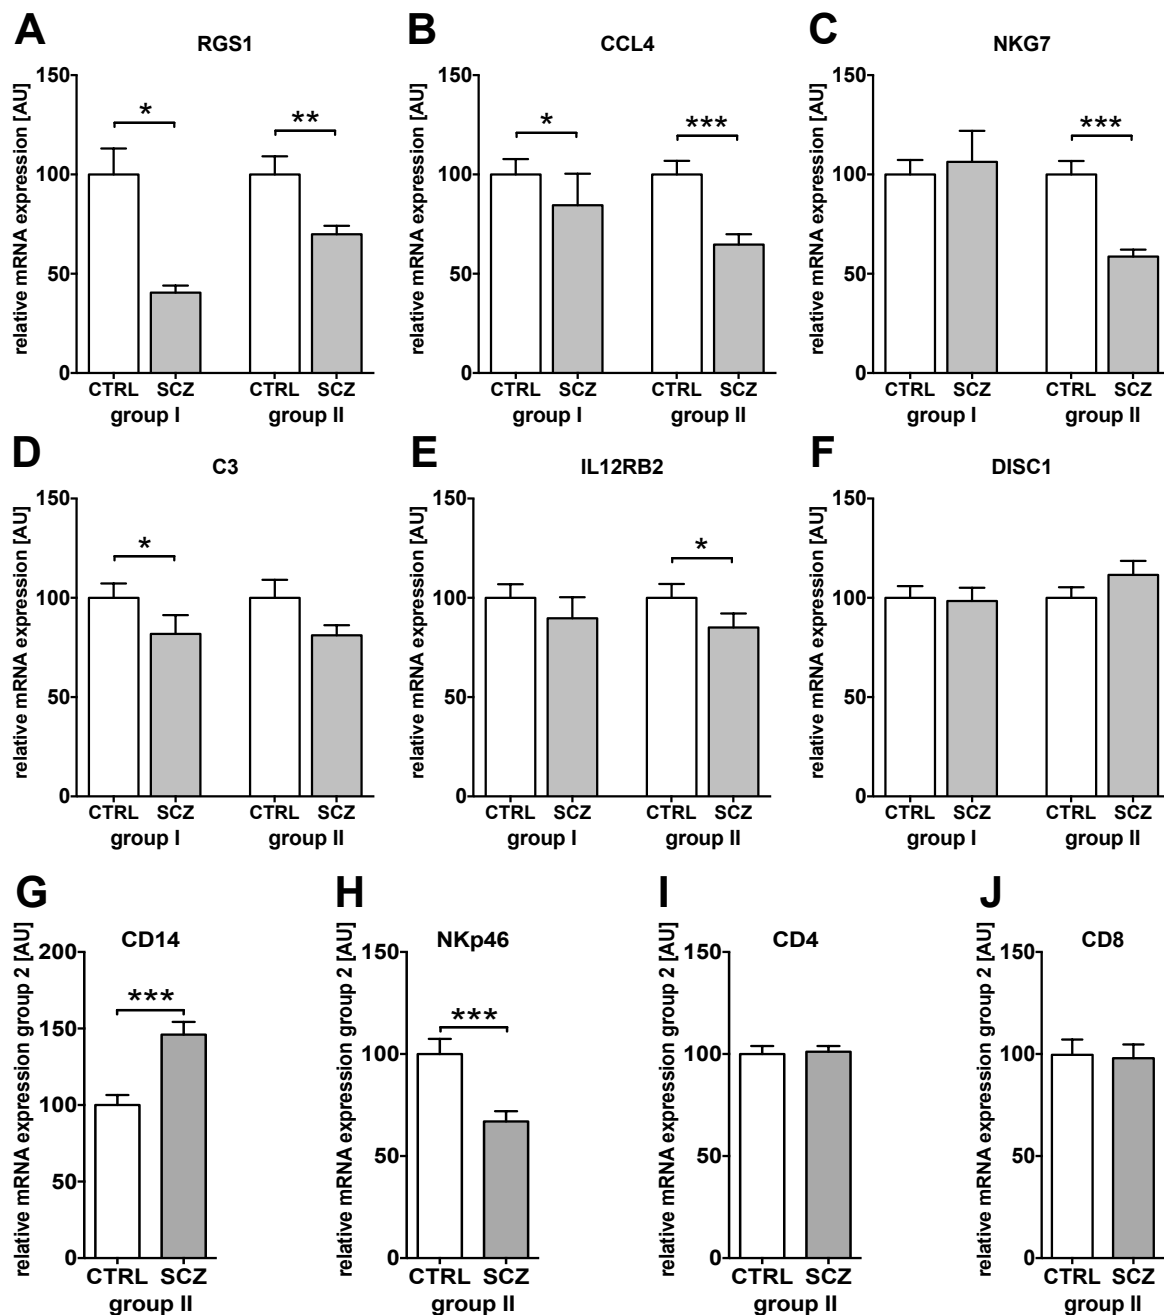

**Supplementary Figure S5: Validation of microarray hits deregulated in PBMCs of tgDISC1 rats by quantitative Real-Time PCR in human PBMCs derived from two independent cohorts of patients diagnosed with schizophrenia (grey bars) and control subjects (light bars). Subjects of group I are depicted on the left side, subjects of independent group II are shown on the right side of each bar graph. (A) Reduced expression**

of RGS1 was found in SCZ patients of both groups. Group I U-test  $*P = 0.033$ ; group II U-test  $**P = 0.006$ . **(B)** Reduced mRNA levels of CCL4 were seen in SCZ subjects of both cohorts. Group I T-test  $*P = 0.017$ ; group II T-test  $***P < 0.001$ . **(C)** A reduction of expression levels of NKG7 could be shown in SCZ patients of group II. Group I U-test  $P = 0.909$ ; T-test  $***P < 0.001$ . **(D)** Group I showed a reduced expression of C3 in SCZ patients. Group I T-test  $*P = 0.016$ ; Group II U-test  $P = 0.337$ . **(E)** Levels of IL12RB2 mRNA were decreased in SCZ subjects of group II. Group I U-test  $P = 0.630$ ; Group II U-test  $*P = 0.038$ . **(F)** DISC1 mRNA levels were unchanged in both cohorts. Group I T-test  $P = 0.505$ ; U-test  $P = 0.564$ . **(G)** Levels of CD14 mRNA, a marker for monocytes, were strongly increased in SCZ patients. Group II T-test  $***P < 0.001$ . **(H)** In contrast, expression of NKp46, a marker for natural killer cells, was reduced in SCZ patients. Group II -test  $***P < 0.001$ . **(I)** No change in CD4 mRNA, a marker for CD4-positive T-cells, could be detected in group II. T-test  $P = 0.806$ . **(J)** Equal expression of CD8B, a marker for CD8<sup>+</sup> T cells. Group II T-test  $P = 0.866$ . Abbreviations: CTRL, control subjects; SCZ, schizophrenic patients; AU, arbitrary units. All means  $\pm$  s.e.m.

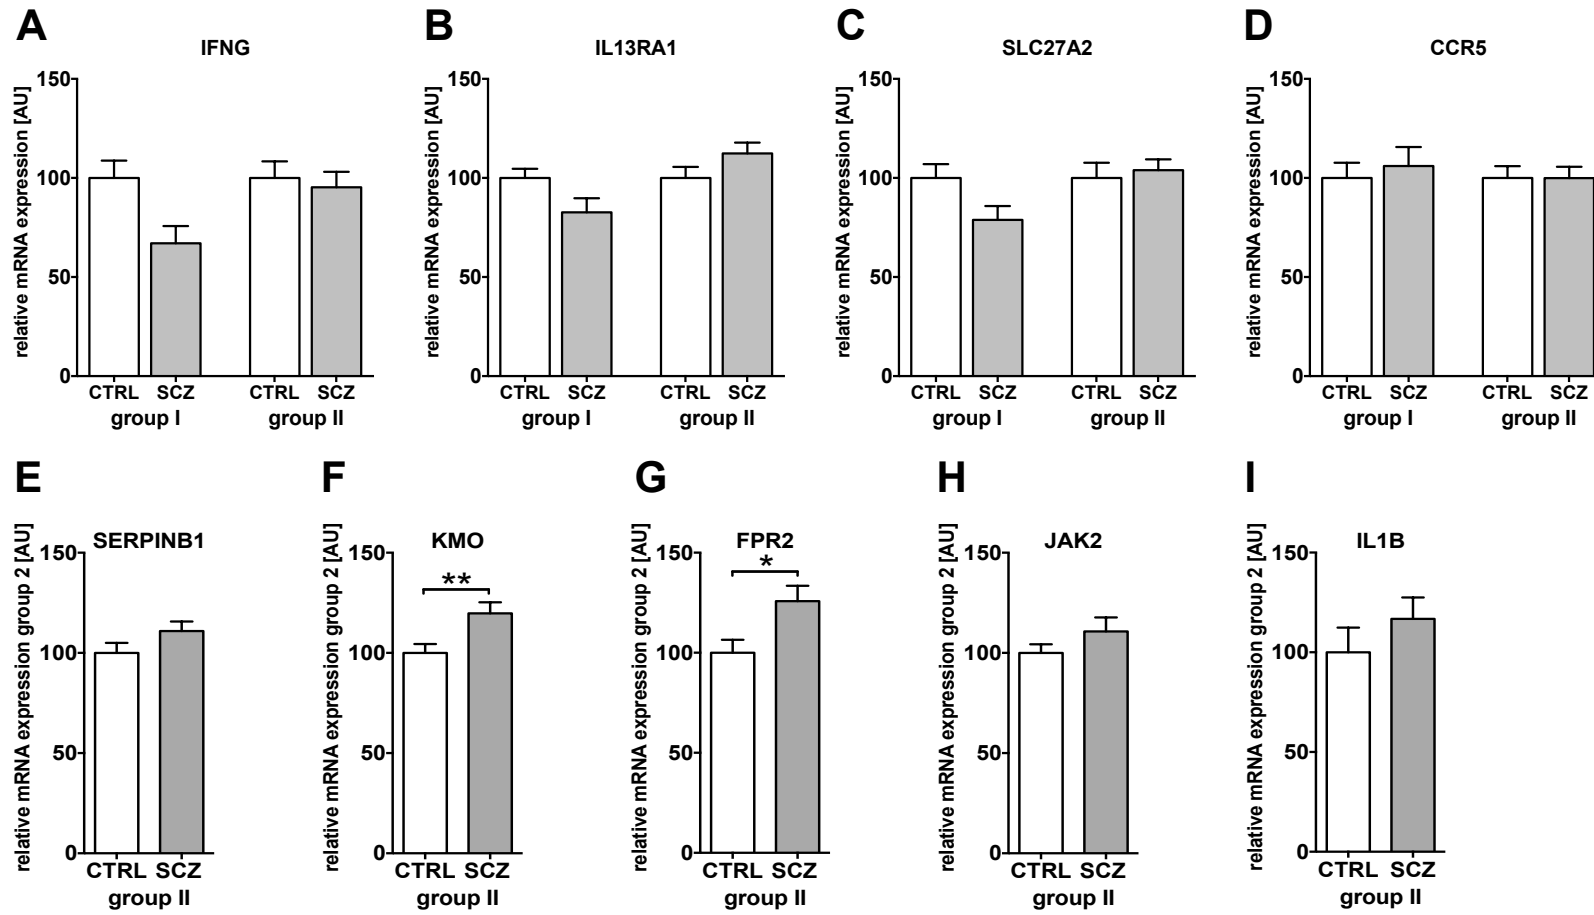

**Supplementary Figure S6: Validation of further microarray hits deregulated in PBMCs of tgDISC1 rats by qPCR in human PBMCs derived from two independent cohorts of patients diagnosed with schizophrenia (grey bars) and control subjects (light bars).** (A) No change in expression of IFNG was shown for both groups. Group I U-test  $P = 0.113$ ; group II U-test  $P = 0.504$ . (B) Expression of IL13RA1 was not significantly changed. Group I T-test  $P = 0.077$ ; group II U-test  $P = 0.098$ . (C) Expression of SLC27A2 was comparable between groups. Group I T-test  $P = 0.099$ ; group II U-test  $P = 0.109$ . (D) No change in expression levels of CCR5 was seen in either group. Group I T-test  $P = 0.538$ ; group II T-test  $P = 0.903$ . (E) No change in expression levels of SERPINB1 was detected in group II. U-test  $P = 0.114$ . (F) Group II SCZ patients exhibited increased expression levels of KMO. Group II T-test  $**P = 0.007$ . (G) Increased mRNA levels of FPR2 were measured in SCZ. Group II U-test  $*P = 0.013$ . (H) No change in expression levels of JAK2 was detected. Group II U-test  $P = 0.437$ . (I) IL1B levels were comparable between CTRL and SCZ. Group II U-test  $P = 0.121$ . All means  $\pm$  s.e.m.



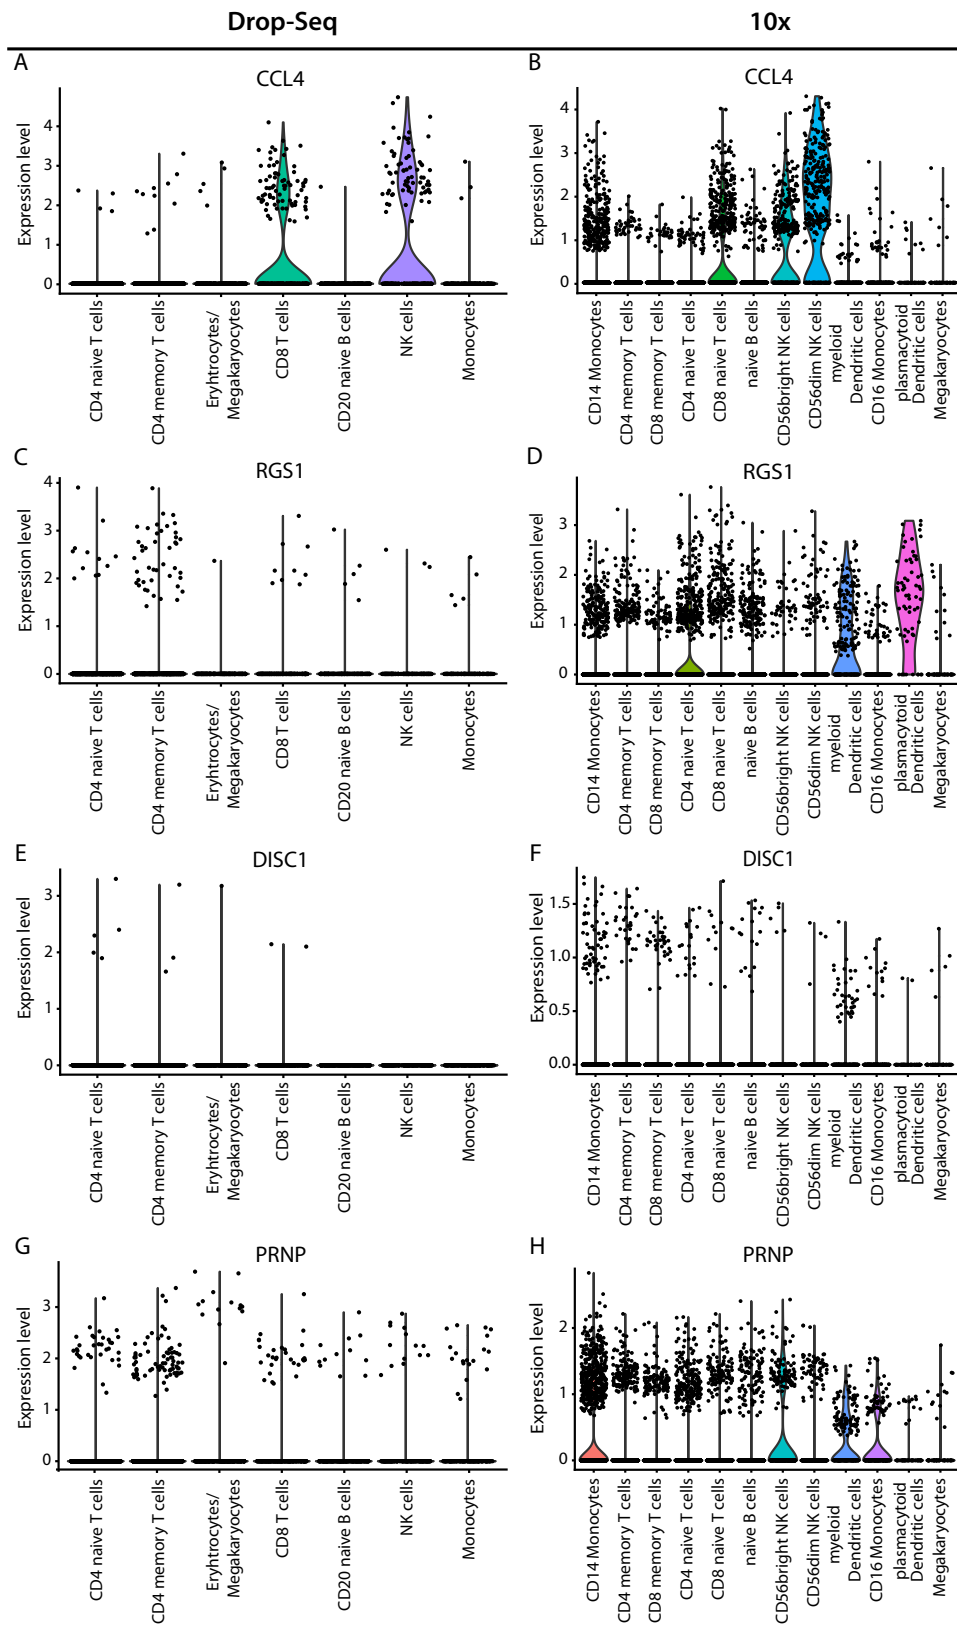

**Supplementary Figure S7: Expression profile of targets in human PBMC subclasses.**

Gene expression profile of selected marker genes from two independent single cell RNA-sequencing datasets (see Methods for description). (A), (B) it is unclear whether the observed decrease in CCL4 expression can be explained by the decrease in NK cell count, as CCL4 is also expressed in CD8-positive T cells. (C), (D) CD4 positive T cells and macrophages constitute the predominant source of RGS1. (E), (F) DISC1 is expressed at low levels in PBMCs, whereas the Prion protein (PRNP) is strongly expressed in all PBMC subtypes. Note that in the tgDISC1 rat the transgene is expressed under the hamster Prnp promoter (*I*). The data show that there is Prnp promoter-driven overexpression but not ectopic expression of DISC1 when human PBMCs are taken for comparison.

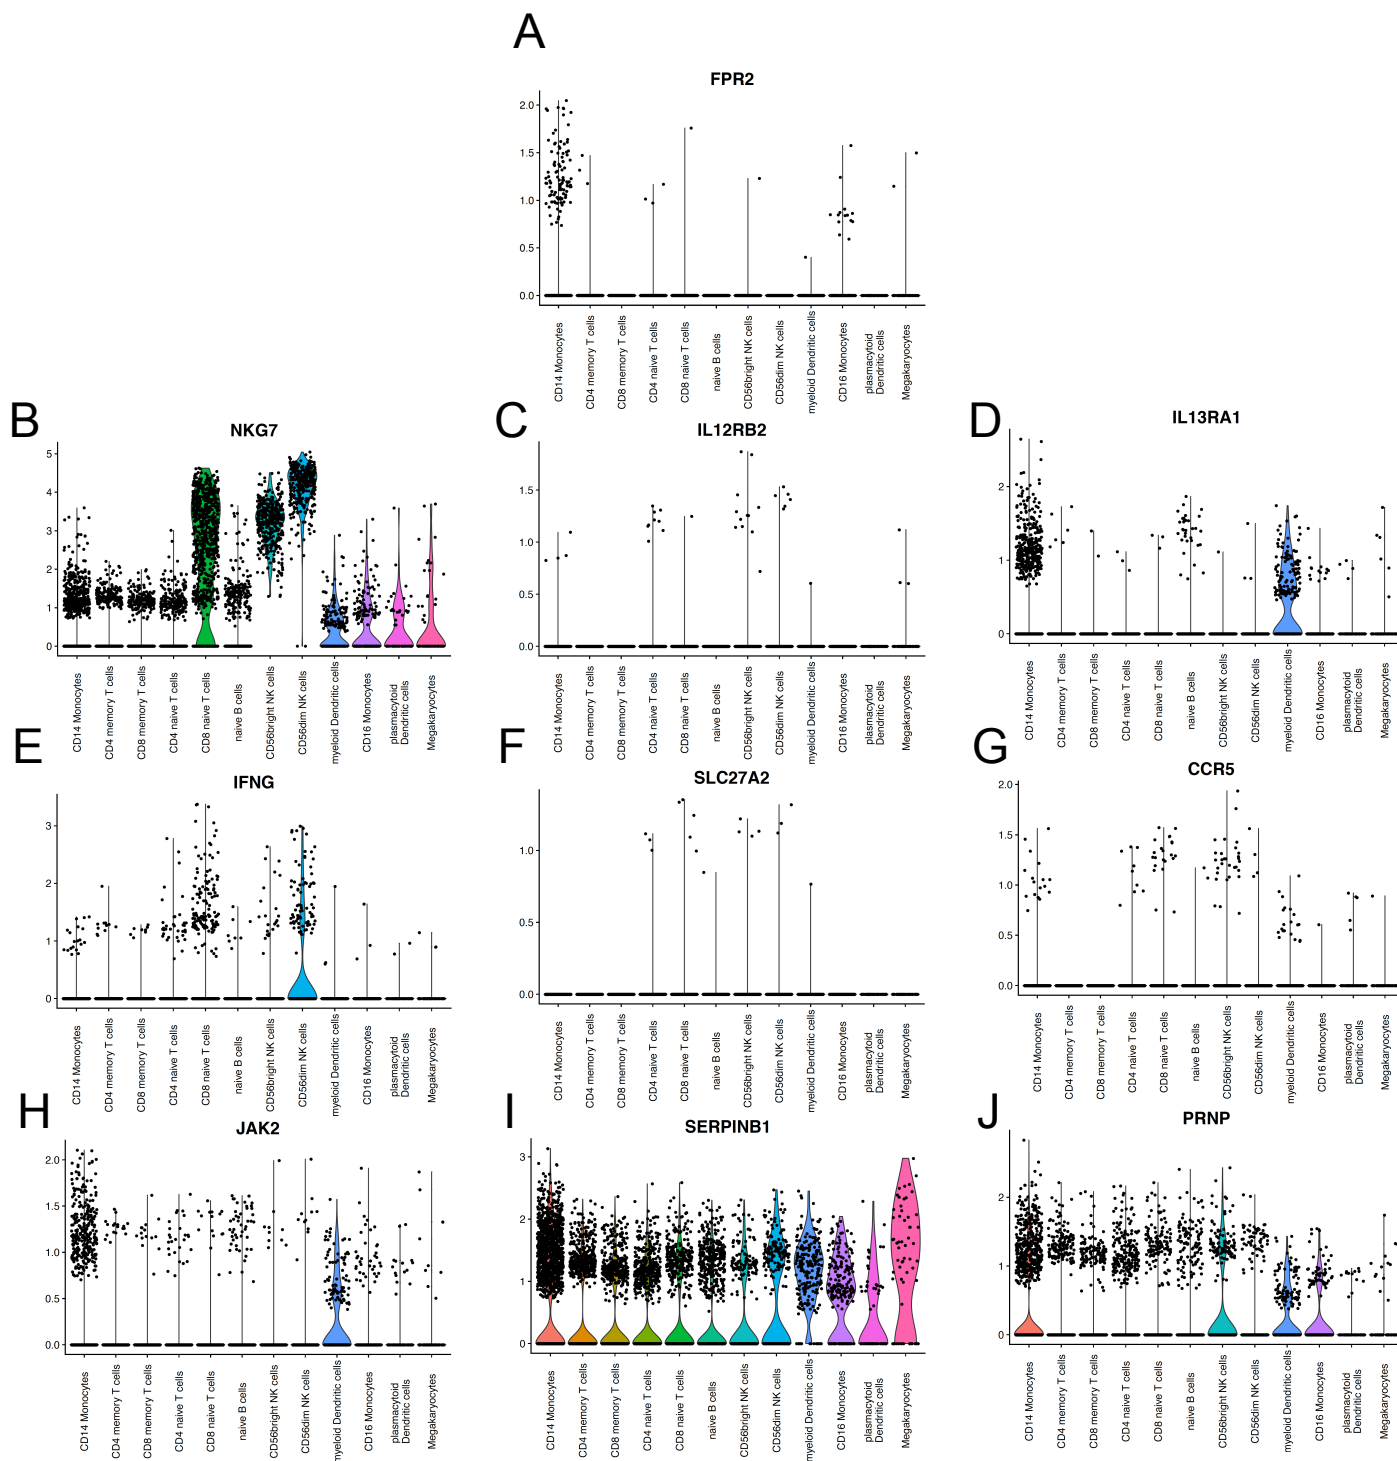

**Supplementary Figure S8: Further expression data of transcripts in human PBMC subpopulations.** Gene expression profile of selected marker genes from the larger RNA-sequencing dataset (2).

|         | CCL4 | NKG7   | KMO     | FPR2    | IL12RB2 | IFNG    | IL13RA1 | SLC27A2 | SERPINB1 | CCR5   | DISC1  | C3      | JAK2    | IL1B   | CD14   | NKp46  | CD4    | CD8    |
|---------|------|--------|---------|---------|---------|---------|---------|---------|----------|--------|--------|---------|---------|--------|--------|--------|--------|--------|
| RGS1    | r =  | 0.079  | -0.025  | .416**  | 0.148   | 0.051   | 0.095   | 0.081   | .338*    | .423** | .400*  | 0.031   | 0.192   | 0.138  | -0.184 | 0.123  | 0.133  | -0.056 |
|         | P =  | 0.632  | 0.881   | 0.006   | 0.344   | 0.754   | 0.553   | 0.608   | 0.031    | 0.008  | 0.014  | 0.844   | 0.254   | 0.414  | 0.291  | 0.496  | 0.428  | 0.737  |
|         | n =  | 39     | 38      | 42      | 43      | 40      | 41      | 42      | 41       | 38     | 37     | 42      | 37      | 37     | 33     | 35     | 33     | 38     |
| CCL4    | r =  | .608** | -0.137  | -.434** | 0.2     | .370*   | -.310*  | -0.018  | 0.188    | -0.116 | -.351* | 0.239   | -0.062  | 0.07   | -.364* | .459** | -0.192 | 0.268  |
|         | P =  | 0.000  | 0.394   | 0.005   | 0.215   | 0.019   | 0.048   | 0.912   | 0.273    | 0.5    | 0.027  | 0.166   | 0.724   | 0.702  | 0.038  | 0.008  | 0.263  | 0.113  |
|         | n =  | 36     | 41      | 41      | 40      | 40      | 41      | 39      | 36       | 36     | 40     | 35      | 35      | 32     | 33     | 32     | 36     | 36     |
| NKG7    | r =  | -0.258 | -.502** | 0.199   | .370*   | -.464** | 0.187   | -0.045  | -0.009   | -0.257 | -0.011 | -0.145  | -0.194  | -.393* | .419*  | -0.145 | .378*  |        |
|         | P =  | 0.113  | 0.001   | 0.238   | 0.022   | 0.003   | 0.247   | 0.799   | 0.962    | 0.114  | 0.951  | 0.42    | 0.313   | 0.026  | 0.019  | 0.413  | 0.028  |        |
|         | n =  | 39     | 40      | 37      | 38      | 39      | 40      | 34      | 33       | 39     | 33     | 33      | 29      | 32     | 31     | 34     | 34     |        |
| KMO     | r =  | .447** | 0.173   | 0.022   | .303*   | -0.004  | 0.198   | 0.306   | 0.284    | 0.192  | .400*  | 0.204   | 0.116   | -0.141 | 0.23   | -0.179 |        |        |
|         | P =  | 0.002  | 0.279   | 0.891   | 0.048   | 0.981   | 0.228   | 0.062   | 0.065    | 0.249  | 0.013  | 0.248   | 0.501   | 0.426  | 0.159  | 0.276  |        |        |
|         | n =  | 44     | 41      | 42      | 43      | 42      | 39      | 38      | 43       | 38     | 38     | 34      | 36      | 34     | 39     | 39     |        |        |
| FPR2    | r =  | -0.086 | -0.159  | .493**  | -0.028  | 0.063   | 0.217   | .344*   | -0.048   | .322*  | -.386* | .629**  | -0.305  | 0.127  | -0.258 |        |        |        |
|         | P =  | 0.59   | 0.309   | 0.001   | 0.857   | 0.704   | 0.192   | 0.022   | 0.775    | 0.048  | 0.024  | 0.000   | 0.079   | 0.441  | 0.112  |        |        |        |
|         | n =  | 42     | 43      | 44      | 43      | 39      | 38      | 44      | 38       | 44     | 38     | 34      | 36      | 34     | 39     |        |        |        |
| IL12RB2 | r =  | 0.109  | -0.197  | .403*   | -0.026  | 0.201   | .309*   | -0.045  | 0.206    | 0.188  | -0.158 | 0.057   | -0.414* | 0.263  |        |        |        |        |
|         | P =  | 0.498  | 0.216   | 0.01    | 0.879   | 0.239   | 0.05    | 0.797   | 0.706    | 0.312  | 0.379  | 0.756   | 0.012   | 0.122  |        |        |        |        |
|         | n =  | 41     | 41      | 40      | 36      | 36      | 41      | 35      | 36       | 31     | 33     | 32      | 36      | 36     |        |        |        |        |
| IFNG    | r =  | -0.209 | .366*   | 0.061   | .331*   | 0.028   | 0.19    | -0.019  | -0.178   | 0.296  | -0.061 | .501**  |         |        |        |        |        |        |
|         | P =  | 0.184  | 0.019   | 0.719   | 0.045   | 0.861   | 0.1     | 0.268   | 0.916    | 0.315  | 0.1    | 0.72    | 0.002   |        |        |        |        |        |
|         | n =  | 42     | 41      | 37      | 37      | 42      | 36      | 36      | 32       | 34     | 32     | 37      | 37      |        |        |        |        |        |
| IL13RA1 | r =  | -0.212 | 0.197   | 0.054   | 0.127   | 0.153   | 0.295   | 0.246   | .555**   | -0.084 | 0.241  | -.370** |         |        |        |        |        |        |
|         | P =  | 0.178  | 0.236   | 0.752   | 0.418   | 0.367   | 0.076   | 0.161   | 0.001    | 0.641  | 0.146  | 0.022   |         |        |        |        |        |        |
|         | n =  | 42     | 38      | 37      | 43      | 37      | 37      | 34      | 35       | 33     | 38     | 38      |         |        |        |        |        |        |
| SLC27A2 | r =  | 0.165  | .706**  | 0.241   | -0.01   | 0.059   | -0.158  | -0.049  | -0.104   | 0.052  | .534** |         |         |        |        |        |        |        |
|         | P =  | 0.329  | 0.000   | 0.124   | 0.956   | 0.733   | 0.388   | 0.78    | 0.564    | 0.758  | 0.001  |         |         |        |        |        |        |        |
|         | n =  | 37     | 36      | 42      | 36      | 36      | 32      | 35      | 33       | 37     | 37     |         |         |        |        |        |        |        |
| SLC27A2 | r =  | 0.272  | 0.064   | -0.236  | 0.282   | 0.152   | 0.17    | 0.111   | -0.116   | -0.135 |        |         |         |        |        |        |        |        |
|         | P =  | 0.099  | 0.703   | 0.153   | 0.087   | 0.391   | 0.321   | 0.532   | 0.483    | 0.414  |        |         |         |        |        |        |        |        |
|         | n =  | 38     | 38      | 38      | 38      | 34      | 36      | 34      | 39       | 39     |        |         |         |        |        |        |        |        |
| CCR5    | r =  | 0.314  | 0.249   | .443**  | -0.047  | 0.055   | -0.205  | 0.171   | .346*    |        |        |         |         |        |        |        |        |        |
|         | P =  | 0.058  | 0.138   | 0.006   | 0.793   | 0.753   | 0.252   | 0.305   | 0.033    |        |        |         |         |        |        |        |        |        |
|         | n =  | 37     | 37      | 37      | 33      | 35      | 33      | 38      | 38       |        |        |         |         |        |        |        |        |        |
| DISC1   | r =  | -0.042 | .325*   | 0.274   | .343*   | -.401*  | -0.072  | 0.146   |          |        |        |         |         |        |        |        |        |        |
|         | P =  | 0.807  | 0.05    | 0.123   | 0.044   | 0.021   | 0.668   | 0.382   |          |        |        |         |         |        |        |        |        |        |
|         | n =  | 37     | 37      | 33      | 35      | 33      | 38      | 38      |          |        |        |         |         |        |        |        |        |        |
| C3      | r =  | 0.268  | 0.171   | -0.201  | -0.008  | 0.287   | 0.132   |         |          |        |        |         |         |        |        |        |        |        |
|         | P =  | 0.109  | 0.332   | 0.247   | 0.965   | 0.08    | 0.431   |         |          |        |        |         |         |        |        |        |        |        |
|         | n =  | 37     | 34      | 35      | 33      | 38      | 38      |         |          |        |        |         |         |        |        |        |        |        |
| JAK2    | r =  | .435*  | 0.277   | -.365*  | 0.158   | -0.131  |         |         |          |        |        |         |         |        |        |        |        |        |
|         | P =  | 0.011  | 0.107   | 0.037   | 0.343   | 0.433   |         |         |          |        |        |         |         |        |        |        |        |        |
|         | n =  | 33     | 35      | 33      | 38      | 38      |         |         |          |        |        |         |         |        |        |        |        |        |
| IL1B    | r =  | .448*  | 0.083   | 0.02    | -.400*  |         |         |         |          |        |        |         |         |        |        |        |        |        |
|         | P =  | 0.01   | 0.668   | 0.911   | 0.019   |         |         |         |          |        |        |         |         |        |        |        |        |        |
|         | n =  | 32     | 29      | 34      | 34      |         |         |         |          |        |        |         |         |        |        |        |        |        |
| CD14    | r =  | -0.235 | -0.073  | -.384*  |         |         |         |         |          |        |        |         |         |        |        |        |        |        |
|         | P =  | 0.203  | 0.671   | 0.021   |         |         |         |         |          |        |        |         |         |        |        |        |        |        |
|         | n =  | 31     | 36      | 36      |         |         |         |         |          |        |        |         |         |        |        |        |        |        |
| NKp46   | r =  | -0.141 | 0.121   |         |         |         |         |         |          |        |        |         |         |        |        |        |        |        |
|         | P =  | 0.427  | 0.494   |         |         |         |         |         |          |        |        |         |         |        |        |        |        |        |
|         | n =  | 34     | 34      |         |         |         |         |         |          |        |        |         |         |        |        |        |        |        |
| CD4     | r =  | -0.189 |         |         |         |         |         |         |          |        |        |         |         |        |        |        |        |        |
|         | P =  | 0.248  |         |         |         |         |         |         |          |        |        |         |         |        |        |        |        |        |
|         | n =  | 39     |         |         |         |         |         |         |          |        |        |         |         |        |        |        |        |        |

CTRL

|                | CCL4                                    | NKG7                                       | KMO                                     | FPR2                                    | IL12RB2                                 | IFNG                                       | IL13RA1                                     | SLC27A2                                    | SERPINB1                                   | CCR5                                       | DISC1                                      | C3                                      | JAK2                                       | IL1B                                       | CD14                                         | NKp46                                      | CD4                                        | CD8                                         |                                         |
|----------------|-----------------------------------------|--------------------------------------------|-----------------------------------------|-----------------------------------------|-----------------------------------------|--------------------------------------------|---------------------------------------------|--------------------------------------------|--------------------------------------------|--------------------------------------------|--------------------------------------------|-----------------------------------------|--------------------------------------------|--------------------------------------------|----------------------------------------------|--------------------------------------------|--------------------------------------------|---------------------------------------------|-----------------------------------------|
| <b>RGS1</b>    | $r = -0.145$<br>$P = 0.311$<br>$n = 51$ | $r = 0.073$<br>$P = 0.605$<br>$n = 52$     | $r = 0.029$<br>$P = 0.841$<br>$n = 50$  | $r = -0.093$<br>$P = 0.519$<br>$n = 50$ | $r = 0.012$<br>$P = 0.935$<br>$n = 51$  | $r = -0.005$<br>$P = 0.973$<br>$n = 54$    | $r = -0.212$<br>$P = 0.132$<br>$n = 52$     | $r = .371^{**}$<br>$P = 0.006$<br>$n = 54$ | $r = 0.046$<br>$P = 0.756$<br>$n = 48$     | $r = 0.224$<br>$P = 0.125$<br>$n = 48$     | $r = 0.136$<br>$P = 0.353$<br>$n = 49$     | $r = 0.124$<br>$P = 0.418$<br>$n = 45$  | $r = 0.214$<br>$P = 0.149$<br>$n = 47$     | $r = 0.09$<br>$P = 0.564$<br>$n = 43$      | $r = -0.064$<br>$P = 0.668$<br>$n = 47$      | $r = -0.144$<br>$P = 0.346$<br>$n = 45$    | $r = -0.2$<br>$P = 0.165$<br>$n = 50$      | $r = 0.017$<br>$P = 0.909$<br>$n = 50$      |                                         |
| <b>CCL4</b>    |                                         | $r = .682^{**}$<br>$P = 0.000$<br>$n = 49$ | $r = -0.169$<br>$P = 0.256$<br>$n = 47$ | $r = -0.102$<br>$P = 0.494$<br>$n = 47$ | $r = .475^{**}$<br>$P = 0$<br>$n = 50$  | $r = .421^{**}$<br>$P = 0.002$<br>$n = 51$ | $r = -0.258$<br>$P = 0.074$<br>$n = 49$     | $r = -0.188$<br>$P = 0.185$<br>$n = 51$    | $r = -0.049$<br>$P = 0.75$<br>$n = 45$     | $r = 0.015$<br>$P = 0.922$<br>$n = 45$     | $r = -0.172$<br>$P = 0.253$<br>$n = 46$    | $r = 0.144$<br>$P = 0.358$<br>$n = 43$  | $r = 0.004$<br>$P = 0.978$<br>$n = 44$     | $r = -0.037$<br>$P = 0.817$<br>$n = 41$    | $r = -0.27$<br>$P = 0.077$<br>$n = 44$       | $r = .819^{**}$<br>$P = 0.000$<br>$n = 43$ | $r = -0.179$<br>$P = 0.228$<br>$n = 47$    | $r = 0.108$<br>$P = 0.47$<br>$n = 47$       |                                         |
| <b>NKG7</b>    |                                         |                                            | $r = -0.15$<br>$P = 0.31$<br>$n = 48$   | $r = -0.145$<br>$P = 0.319$<br>$n = 49$ | $r = 0.23$<br>$P = 0.112$<br>$n = 49$   | $r = .406^{**}$<br>$P = 0.003$<br>$n = 52$ | $r = -0.280^{*}$<br>$P = 0.049$<br>$n = 50$ | $r = -0.101$<br>$P = 0.475$<br>$n = 52$    | $r = -0.246$<br>$P = 0.099$<br>$n = 46$    | $r = 0.118$<br>$P = 0.434$<br>$n = 46$     | $r = -0.089$<br>$P = 0.552$<br>$n = 47$    | $r = 0.281$<br>$P = 0.065$<br>$n = 44$  | $r = -0.076$<br>$P = 0.619$<br>$n = 45$    | $r = -0.266$<br>$P = 0.092$<br>$n = 41$    | $r = -0.463^{**}$<br>$P = 0.001$<br>$n = 45$ | $r = .480^{**}$<br>$P = 0.001$<br>$n = 43$ | $r = -0.224$<br>$P = 0.126$<br>$n = 48$    | $r = 0.126$<br>$P = 0.392$<br>$n = 48$      |                                         |
| <b>KMO</b>     |                                         |                                            |                                         | $r = 0.211$<br>$P = 0.16$<br>$n = 46$   | $r = 0.000$<br>$P = 0.999$<br>$n = 47$  | $r = 0.112$<br>$P = 0.437$<br>$n = 50$     | $r = -0.086$<br>$P = 0.555$<br>$n = 49$     | $r = 0.009$<br>$P = 0.951$<br>$n = 50$     | $r = 0.053$<br>$P = 0.727$<br>$n = 45$     | $r = 0.083$<br>$P = 0.588$<br>$n = 45$     | $r = .566^{**}$<br>$P = 0.000$<br>$n = 45$ | $r = 0.031$<br>$P = 0.847$<br>$n = 41$  | $r = 0.191$<br>$P = 0.215$<br>$n = 44$     | $r = 0.277$<br>$P = 0.084$<br>$n = 40$     | $r = 0.101$<br>$P = 0.52$<br>$n = 43$        | $r = -0.158$<br>$P = 0.317$<br>$n = 42$    | $r = -0.092$<br>$P = 0.544$<br>$n = 46$    | $r = -0.098$<br>$P = 0.519$<br>$n = 46$     |                                         |
| <b>FPR2</b>    |                                         |                                            |                                         |                                         | $r = -0.187$<br>$P = 0.209$<br>$n = 47$ | $r = -0.123$<br>$P = 0.393$<br>$n = 50$    | $r = .336^{*}$<br>$P = 0.019$<br>$n = 48$   | $r = -0.03$<br>$P = 0.839$<br>$n = 50$     | $r = 0.045$<br>$P = 0.767$<br>$n = 45$     | $r = -0.113$<br>$P = 0.466$<br>$n = 44$    | $r = 0.092$<br>$P = 0.549$<br>$n = 45$     | $r = 0.081$<br>$P = 0.606$<br>$n = 43$  | $r = 0.152$<br>$P = 0.325$<br>$n = 44$     | $r = .411^{**}$<br>$P = 0.009$<br>$n = 39$ | $r = .693^{**}$<br>$P = 0.000$<br>$n = 43$   | $r = 0.024$<br>$P = 0.88$<br>$n = 41$      | $r = 0.000$<br>$P = 0.999$<br>$n = 46$     | $r = -0.300^{*}$<br>$P = 0.043$<br>$n = 46$ |                                         |
| <b>IL12RB2</b> |                                         |                                            |                                         |                                         |                                         | $r = .295^{*}$<br>$P = 0.035$<br>$n = 51$  | $r = -0.222$<br>$P = 0.126$<br>$n = 49$     | $r = 0.013$<br>$P = 0.928$<br>$n = 51$     | $r = 0.159$<br>$P = 0.298$<br>$n = 45$     | $r = 0.24$<br>$P = 0.112$<br>$n = 45$      | $r = 0.24$<br>$P = 0.108$<br>$n = 46$      | $r = 0.019$<br>$P = 0.904$<br>$n = 43$  | $r = 0.189$<br>$P = 0.22$<br>$n = 44$      | $r = 0.187$<br>$P = 0.241$<br>$n = 41$     | $r = -0.125$<br>$P = 0.414$<br>$n = 45$      | $r = .388^{*}$<br>$P = 0.011$<br>$n = 42$  | $r = -.319^{*}$<br>$P = 0.029$<br>$n = 47$ | $r = 0.103$<br>$P = 0.492$<br>$n = 47$      |                                         |
| <b>IFNG</b>    |                                         |                                            |                                         |                                         |                                         |                                            | $r = -0.245$<br>$P = 0.08$<br>$n = 52$      | $r = 0.169$<br>$P = 0.222$<br>$n = 54$     | $r = -0.2$<br>$P = 0.173$<br>$n = 48$      | $r = .322^{*}$<br>$P = 0.026$<br>$n = 48$  | $r = 0.037$<br>$P = 0.801$<br>$n = 49$     | $r = 0.177$<br>$P = 0.245$<br>$n = 45$  | $r = 0.232$<br>$P = 0.116$<br>$n = 47$     | $r = 0.03$<br>$P = 0.847$<br>$n = 43$      | $r = -0.23$<br>$P = 0.12$<br>$n = 47$        | $r = 0.29$<br>$P = 0.053$<br>$n = 45$      | $r = 0.058$<br>$P = 0.687$<br>$n = 50$     | $r = 0.103$<br>$P = 0.478$<br>$n = 50$      |                                         |
| <b>IL13RA1</b> |                                         |                                            |                                         |                                         |                                         |                                            |                                             | $r = -0.121$<br>$P = 0.394$<br>$n = 52$    | $r = .395^{**}$<br>$P = 0.006$<br>$n = 47$ | $r = -0.018$<br>$P = 0.907$<br>$n = 46$    | $r = -0.045$<br>$P = 0.766$<br>$n = 47$    | $r = -0.028$<br>$P = 0.861$<br>$n = 43$ | $r = 0.14$<br>$P = 0.354$<br>$n = 46$      | $r = 0.069$<br>$P = 0.669$<br>$n = 41$     | $r = .444^{**}$<br>$P = 0.002$<br>$n = 45$   | $r = -0.147$<br>$P = 0.348$<br>$n = 43$    | $r = 0.021$<br>$P = 0.888$<br>$n = 48$     | $r = -.430^{**}$<br>$P = 0.002$<br>$n = 48$ |                                         |
| <b>SLC27A2</b> |                                         |                                            |                                         |                                         |                                         |                                            |                                             |                                            | $r = 0.043$<br>$P = 0.773$<br>$n = 48$     | $r = .378^{**}$<br>$P = 0.008$<br>$n = 48$ | $r = .343^{*}$<br>$P = 0.016$<br>$n = 49$  | $r = 0.128$<br>$P = 0.403$<br>$n = 45$  | $r = 0.259$<br>$P = 0.079$<br>$n = 47$     | $r = 0.273$<br>$P = 0.077$<br>$n = 43$     | $r = -0.032$<br>$P = 0.828$<br>$n = 47$      | $r = -0.252$<br>$P = 0.094$<br>$n = 45$    | $r = -0.108$<br>$P = 0.453$<br>$n = 50$    | $r = 0.051$<br>$P = 0.723$<br>$n = 50$      |                                         |
| <b>SLC27A2</b> |                                         |                                            |                                         |                                         |                                         |                                            |                                             |                                            |                                            | $r = .434^{**}$<br>$P = 0.003$<br>$n = 46$ | $r = 0.058$<br>$P = 0.713$<br>$n = 43$     | $r = -0.246$<br>$P = 0.111$<br>$n = 46$ | $r = 0.014$<br>$P = 0.924$<br>$n = 46$     | $r = -0.004$<br>$P = 0.98$<br>$n = 41$     | $r = .412^{**}$<br>$P = 0.005$<br>$n = 45$   | $r = -0.012$<br>$P = 0.938$<br>$n = 42$    | $r = -0.096$<br>$P = 0.516$<br>$n = 48$    | $r = 0.065$<br>$P = 0.661$<br>$n = 48$      |                                         |
| <b>CCR5</b>    |                                         |                                            |                                         |                                         |                                         |                                            |                                             |                                            |                                            |                                            | $r = 0.202$<br>$P = 0.195$<br>$n = 43$     | $r = -0.025$<br>$P = 0.874$<br>$n = 43$ | $r = 0.032$<br>$P = 0.836$<br>$n = 45$     | $r = 0.117$<br>$P = 0.467$<br>$n = 41$     | $r = -0.039$<br>$P = 0.801$<br>$n = 45$      | $r = 0.07$<br>$P = 0.66$<br>$n = 42$       | $r = -0.029$<br>$P = 0.845$<br>$n = 48$    | $r = -0.043$<br>$P = 0.771$<br>$n = 48$     |                                         |
| <b>DISC1</b>   |                                         |                                            |                                         |                                         |                                         |                                            |                                             |                                            |                                            |                                            |                                            | $r = 0.258$<br>$P = 0.109$<br>$n = 40$  | $r = .683^{**}$<br>$P = 0.000$<br>$n = 42$ | $r = 0.283$<br>$P = 0.081$<br>$n = 39$     | $r = -0.021$<br>$P = 0.894$<br>$n = 43$      | $r = -0.133$<br>$P = 0.406$<br>$n = 41$    | $r = -0.139$<br>$P = 0.361$<br>$n = 45$    | $r = 0.061$<br>$P = 0.689$<br>$n = 45$      |                                         |
| <b>C3</b>      |                                         |                                            |                                         |                                         |                                         |                                            |                                             |                                            |                                            |                                            |                                            |                                         | $r = 0.189$<br>$P = 0.224$<br>$n = 43$     | $r = 0.074$<br>$P = 0.656$<br>$n = 39$     | $r = 0.093$<br>$P = 0.557$<br>$n = 42$       | $r = 0.141$<br>$P = 0.393$<br>$n = 39$     | $r = -0.018$<br>$P = 0.907$<br>$n = 45$    | $r = -0.157$<br>$P = 0.303$<br>$n = 45$     |                                         |
| <b>JAK2</b>    |                                         |                                            |                                         |                                         |                                         |                                            |                                             |                                            |                                            |                                            |                                            |                                         |                                            | $r = 0.224$<br>$P = 0.165$<br>$n = 40$     | $r = 0.174$<br>$P = 0.258$<br>$n = 44$       | $r = -0.05$<br>$P = 0.757$<br>$n = 41$     | $r = 0.063$<br>$P = 0.674$<br>$n = 47$     | $r = 0.008$<br>$P = 0.96$<br>$n = 47$       |                                         |
| <b>IL1B</b>    |                                         |                                            |                                         |                                         |                                         |                                            |                                             |                                            |                                            |                                            |                                            |                                         |                                            |                                            | $r = 0.478^{**}$<br>$P = 0.002$<br>$n = 40$  | $r = -0.011$<br>$P = 0.947$<br>$n = 37$    | $r = -0.016$<br>$P = 0.917$<br>$n = 43$    | $r = -0.201$<br>$P = 0.196$<br>$n = 43$     |                                         |
| <b>CD14</b>    |                                         |                                            |                                         |                                         |                                         |                                            |                                             |                                            |                                            |                                            |                                            |                                         |                                            |                                            |                                              | $r = -0.146$<br>$P = 0.363$<br>$n = 41$    | $r = 0.079$<br>$P = 0.596$<br>$n = 47$     | $r = -0.167$<br>$P = 0.261$<br>$n = 47$     |                                         |
| <b>NKp46</b>   |                                         |                                            |                                         |                                         |                                         |                                            |                                             |                                            |                                            |                                            |                                            |                                         |                                            |                                            |                                              |                                            | $r = -0.222$<br>$P = 0.148$<br>$n = 44$    | $r = 0.016$<br>$P = 0.916$<br>$n = 44$      | $r = -0.012$<br>$P = 0.936$<br>$n = 50$ |

SCZ

**Supplementary Figure S9: Detailed correlation parameters between top hits expression levels measured in human subject samples of cohort II.** Detailed description of correlation shown in Figure 3A. All correlations have been performed using Spearman's ranked test.. Upper panel gives information for CTRL subjects, lower panel for SCZ subjects. Dark blue color indicates correlations that appear in both, SCZ and CTRL subjects; light blue color marks correlations seen only in CTRL subjects; correlations only appearing in SCZ patients are depicted in red color, color-coding for physiological (light to dark blue) to more pathological (red) relations. Depicted are the  $P$ -value, the correlation coefficient  $r$  and the  $n$  for every correlation.

## References

1. S. V. Trossbach, V. Bader, L. Hecher, M. E. Pum, S. T. Masoud, I. Prikulis, S. Schable, M. A. de Souza Silva, P. Su, B. Boulat, C. Chwiesko, G. Poschmann, K. Stuhler, K. M. Lohr, K. A. Stout, A. Oskamp, S. F. Godsave, A. Muller-Schiffmann, T. Bilzer, H. Steiner, P. J. Peters, A. Bauer, M. Sauvage, A. J. Ramsey, G. W. Miller, F. Liu, P. Seeman, N. J. Brandon, J. P. Huston, C. Korth, Misassembly of full-length Disrupted-in-Schizophrenia 1 protein is linked to altered dopamine homeostasis and behavioral deficits. *Mol. Psychiatry* **21**, 1561-1572 (2016).
2. G. X. Zheng, J. M. Terry, P. Belgrader, P. Ryvkin, Z. W. Bent, R. Wilson, S. B. Ziraldo, T. D. Wheeler, G. P. McDermott, J. Zhu, M. T. Gregory, J. Shuga, L. Montesclaros, J. G. Underwood, D. A. Masquelier, S. Y. Nishimura, M. Schnall-Levin, P. W. Wyatt, C. M. Hindson, R. Bharadwaj, A. Wong, K. D. Ness, L. W. Beppu, H. J. Deeg, C. McFarland, K. R. Loeb, W. J. Valente, N. G. Ericson, E. A. Stevens, J. P. Radich, T. S. Mikkelsen, B. J. Hindson, J. H. Bielas, Massively parallel digital transcriptional profiling of single cells. *Nat. Commun* **8**, 14049 (2017).
